# Supplementary material for: Mapping the functional versatility and fragility of Ras GTPase signaling circuits through in vitro network reconstitution
Source: eLife. 2016 Jan 14;5:e12435. doi: 10.7554/eLife.12435 (PMC4775219; doi:10.7554/eLife.12435)
Supplement: Figure 9—source data 1. — This table contains the relative expression-level data that was used to prepare the plot in Figure 9A. These data were obtained from Genevestigator as outlined in the main-text 'Materials and methods'. DOI: http://dx.doi.org/10.7554/eLife.12435.024 [file elife-12435-fig9-data1.xlsx]

## Sheet: Sheet1
	Source Data for Figure 9. Relative gene expression data from a variety of human tissue and cell types that was used to produce the plot in Figure 8A.
		Relative Gene Expression Level
	Human Cell / Tissue Type	p120GAP	H-RAS	cRAF
	chorionic villus	17.011	12.473	13.833
	placenta	16.521	12.31	13.438
	urothelial cell	15.031	14.542	13.262
	iliac vein endothelial cell	14.708	12.293	14
	lung fibroblast	14.707	13	13.689
	human osteoblast like cell	14.654	13.453	14.091
	dental pulp stem cell	14.58	12.597	13.817
	bone marrow stromal cell	14.422	13.304	13.877
	iris microvascular endothelial cell	14.323	14.036	13.463
	microvascular endothelial cell	14.312	13.057	13.49
	lung myofibroblasts	14.246	13.928	13.498
	osteoblast	14.245	13.085	13.94
	coronary artery endothelial cell	14.2	13.58	13.747
	choroidal microvascular endothelial cell	14.076	14.333	13.629
	trabecular meshwork cell	14.061	12.272	13.348
	chorion villus cell	14.027	12.914	12.771
	hepatic vein endothelial cell	14.025	12.92	14.326
	aortic endothelial cell	13.991	12.831	13.883
	retinal microvascular endothelial cell	13.884	14.594	12.699
	dendritic cell	13.799	11.173	13.647
	neonatal foreskin-derived fibroblast	13.753	12.721	13.718
	dermal fibroblast	13.743	12.857	13.675
	synovial fibroblast	13.711	12.189	13.486
	hepatic myofibroblast	13.697	12.706	12.826
	chondrogenic progenitor cell	13.696	13.177	13.674
	umbilical artery endothelial cell	13.67	12.157	14.021
	alveolar macrophage	13.606	12.142	13.745
	pigment epithelium	13.595	11.818	13.304
	dermal papilla cell	13.529	12.602	14.143
	chondrocyte	13.519	13.078	13.762
	bronchial smooth muscle cell	13.515	11.583	13.335
	bronchial epithelial cell 3D culture	13.507	13.712	13.739
	umbilical vein endothelial cell	13.502	13.431	13.494
	aortic vascular smooth muscle cell	13.484	12.665	13.025
	scalp	13.457	13.236	13.55
	granulosa cell	13.416	11.173	14.233
	melanocyte	13.415	10.643	13.183
	retina	13.383	12.9	13.92
	pulmonary vein endothelial cell	13.377	13.73	14.148
	iliac artery endothelial cell	13.354	13.571	13.918
	Brodmann area 46	13.313	13.09	12.717
	coronary smooth muscle cell	13.298	12.232	13.217
	bone marrow derived mesenchymal stem cell	13.266	12.56	13.077
	hepatic artery endothelial cell	13.266	12.818	14.326
	amniocyte	13.226	12.712	13.603
	labial salivary gland	13.214	11.482	12.992
	retina pigment epithelial cell	13.177	12.473	13.577
	bronchial epithelial cell	13.167	13.931	13.765
	macrophage	13.135	11.465	13.578
	glomerulus	13.122	13.178	14.176
	peripheral blood mononuclear cell (CD14-)	13.102	11.304	13.429
	omental adipose tissue	13.082	11.606	13.249
	pulmonary artery endothelial cell	13.079	13.305	13.641
	monocyte derived macrophage	13.022	11.546	14.486
	breast epithelial cell	13.022	13.014	13.012
	pulmonary microvascular endothelial cell	13.012	13.2	12.836
	left internal mammary artery	13.012	13.296	13.332
	gluteal subcutaneous adipose tissue (glutSAT)	12.967	12.165	13.202
	limbus	12.936	13.731	13.51
	memory B-lymphocyte	12.917	10.84	13.397
	cornea	12.916	14.524	13.671
	tracheal epithelial cell	12.903	12.292	13.316
	oocyte	12.903	10.42	10.372
	conjunctiva	12.872	13.883	13.773
	tarsal conjunctiva	12.872	13.303	13.933
	mucosa (ascending colon)	12.867	11.911	13.208
	colonic crypt	12.822	11.074	13.844
	abdominal subcutaneous adipose tissue (SAAT)	12.809	12.307	13.147
	human bronchial organotypic tissue culture	12.8	12.433	13.336
	human nasal organotypic tissue culture	12.789	12.501	13.384
	tubulointerstitium	12.766	12.242	13.554
	tonsillar T-lymphocyte	12.743	11.491	13.841
	cumulus cell	12.738	11.882	14.188
	synovial membrane	12.738	11.391	13.092
	prefrontal cortex	12.731	12.795	12.217
	astrocyte	12.73	12.765	13.89
	postcentral gyrus	12.72	12.787	12.694
	bone marrow mononuclear cell	12.717	11.131	14.457
	superior frontal gyrus	12.699	12.906	12.654
	aortic root wall	12.699	12.464	13.907
	cuboidal alveolar type 2 cell (AT2)	12.685	11.343	13.647
	synovial fluid mononuclear cell	12.66	12.477	13.658
	choroid	12.652	10.924	12.973
	corpus	12.652	11.612	12.686
	subcutaneous adipose tissue (SAT)	12.631	11.65	12.681
	transverse colon	12.613	11.181	12.9
	neuronal cell	12.605	13.922	13.135
	internal mammary artery wall	12.598	12.461	14.177
	caput	12.567	10.842	12.768
	CD8 T-lymphocyte (activated)	12.564	11.946	13.683
	mediastinal adipose tissue (MAT)	12.559	12.118	13.43
	CD4 T-lymphocyte (resting)	12.521	11.613	13.622
	B-lymphocyte (germinal center)	12.52	11.571	13.606
	frontal pole	12.506	12.621	13.096
	lung	12.497	11.818	13.365
	synovial fluid	12.491	11.661	13.473
	lymphoblast cell	12.491	11.292	13.204
	dermal microvascular lymphatic endothelial cell	12.486	13.097	13.131
	inguinal lymph node	12.463	10.393	12.026
	hippocampus	12.449	12.875	12.691
	T-lymphocyte	12.447	11.411	13.35
	CD4 T-lymphocyte (activated)	12.446	12.847	13.865
	bladder	12.427	11.674	13.201
	large airway epithelial cell	12.393	12.172	13.267
	colon	12.392	11.881	13.261
	hepatocyte	12.391	12.978	13.628
	mammary gland (breast)	12.367	11.771	13.123
	cauda	12.367	11.173	12.832
	thrombus-derived leukocyte	12.36	11.442	14.865
	minor salivary gland	12.329	11.205	13.451
	small airway epithelial cell	12.326	11.931	13.035
	brain (encephalon)	12.301	12.301	12.21
	monocyte derived dendritic cell	12.29	11.53	13.516
	colon polyp	12.288	12.154	13.358
	conjunctival epithelial cell	12.288	14.313	13.664
	neutrophil granulocyte	12.277	10.014	16.101
	hair follicle keratinocyte (CD200-/CD49+)	12.276	13.844	13.581
	peripheral blood mononuclear cell	12.268	11.181	13.809
	conjunctival epithelial cell (sp.)	12.263	12.825	14.262
	sigmoid colon	12.261	11.276	12.805
	nasal epithelium	12.251	12.281	13.164
	B-lymphocyte	12.245	11.465	13.686
	endometrium	12.244	10.969	13.039
	deltoid	12.229	11.951	14.251
	heart left atrial appendage	12.224	11.815	13.851
	lateral rectus	12.213	11.482	13.455
	peripheral blood mononuclear cell (CD14+)	12.194	12.042	13.661
	epidermis	12.193	13.842	14.186
	B-lymphocyte (naive)	12.187	11.223	13.872
	descending colon	12.185	11.233	12.73
	CD8 T-lymphocyte (resting)	12.173	11.149	13.717
	medial rectus	12.172	11.9	13.608
	peripheral blood lymphocyte	12.171	11.836	14.842
	mucosa (oral region)	12.131	13.723	13.646
	spleen	12.128	11.125	13.258
	cerebellum	12.116	12.492	13.172
	ascending colon	12.107	11.429	12.898
	jejunum	12.103	11.581	13.829
	ovary (female gonad)	12.092	11.014	13.429
	mucosa (sigmoideum)	12.084	12.294	13.459
	hair follicle keratinocyte (CD200+/CD49+)	12.082	13.404	13.648
	endometrial stromal cell	12.07	12.25	13.144
	heart right ventricle	12.062	11.824	13.942
	bone marrow hematopoietic stem cell	12.057	11.804	14.078
	associative striatum	12.054	13.741	12.693
	plasma cell	12.052	11.292	13.746
	CD4+/CD25high regulatory T-cell	12.05	10.92	14.502
	myeloid dendritic cell	12.046	10.647	13.683
	gingiva	12.046	13.777	13.431
	biceps femoris	12.044	12.596	14.612
	monocyte (CD14+)	12.04	11.334	14.492
	ileum	12.026	11.468	13.297
	mucosa (colon)	12.025	11.579	13.397
	monocyte	12.023	10.814	14.092
	heart right atrial appendage	12.02	12.069	13.447
	mucosa (descending colon)	12.019	11.356	12.8
	thymus	12.016	11.009	13.348
	oesophagus (esophagus)	12.011	12.577	13.407
	testis (male gonad)	12.007	11.017	12.498
	ileal epithelial cell	12.004	12.024	13.982
	cerebrospinal fluid cell	12	11.344	14.178
	colon epithelial cell (colonocyte)	11.999	12.26	13.205
	occipital lobe	11.984	12.158	12.188
	temporal lobe	11.977	12.13	12.115
	cardiomyocyte	11.963	11.384	13.926
	pancreas	11.949	11.02	12.886
	skin	11.937	12.994	13.727
	mucosa (rectosigmoid colon)	11.934	11.71	12.76
	transiliac crest core	11.92	11.233	13.514
	dorsal root ganglion	11.919	12.041	12.463
	urethra	11.901	11.754	13.366
	bone marrow myeloid cell (CD11b+)	11.886	11.515	14.247
	pancreatic islet	11.881	12.88	12.492
	joints	11.86	11.201	13.284
	frontal lobe	11.86	12.442	12.147
	vulva	11.854	13.088	13.291
	CD4 T-lymphocyte	11.839	11.675	14.091
	heart left ventricle	11.833	11.54	13.556
	rectus abdominus	11.831	12.803	14.573
	epidermal keratinocyte	11.817	13.156	13.691
	leukocyte	11.79	10.925	14.849
	nasopharyngeal epithelium	11.779	10.852	13.439
	polymorphonuclear leukocyte	11.731	9.464	16.008
	diaphragm	11.723	12.354	14.035
	adrenal gland	11.693	11.951	13.401
	nasopharynx	11.691	10.423	13.032
	ovarian surface epithelium cell	11.675	10.644	13.007
	entorhinal cortex	11.664	12.451	12.502
	middle temporal gyrus	11.649	12.455	12.524
	trigeminal ganglion	11.642	11.817	12.634
	tonsillar T-lymphocyte (activated)	11.634	11.036	13.761
	CD4 T-lymphocyte (naive)	11.632	11.514	14.021
	penis	11.627	12.362	13.451
	prostate stromal fibromuscular cell (CD49a+)	11.626	11.198	13.548
	stomach	11.617	10.96	12.786
	uterine cervix	11.614	11.064	13.089
	myometrium	11.59	10.968	13.024
	pituitary gland	11.575	12.019	12.356
	quadriceps femoris	11.571	13.072	14.468
	liver	11.57	11.227	13.534
	parietal lobe	11.539	12.463	12.315
	cerebral cortex (neopallium)	11.51	12.192	12.026
	aortic valve	11.507	11.741	12.683
	CD8 T-lymphocyte	11.506	11.379	14.099
	T-lymphocyte (resting)	11.5	10.403	12.565
	vastus lateralis	11.497	12.865	14.608
	rectum	11.494	10.716	13.119
	prostate gland	11.493	11.478	12.938
	blood	11.491	10.848	14.468
	bone marrow	11.472	11.143	13.875
	cortex	11.457	11.629	13.215
	spinal cord	11.446	11.825	12.194
	caudate nucleus	11.446	13.109	12.534
	lymphocyte	11.444	11.84	14.314
	aorta	11.431	11.287	13.322
	bladder stromal fibromuscular cell (CD13+)	11.429	12.195	14.173
	B-lymphocyte (anergic)	11.429	11.599	14.333
	cerebral hemisphere	11.425	11.796	12.991
	right ventricle interventricular septum	11.424	13.097	14.582
	substantia nigra	11.41	12.397	12.366
	duodenum	11.406	11.045	13.087
	vagina	11.402	11.65	13.05
	superior vestibular nucleus	11.382	12.095	11.966
	T-lymphocyte (activated)	11.366	12.135	13.065
	oviduct (fallopian tube)	11.334	11.04	13.001
	corpus callosum	11.322	11.675	12.475
	midbrain (mesencephalon)	11.316	12.232	11.899
	pars compacta	11.298	12.452	11.833
	Langerhans cell	11.277	12.299	13.851
	vermis	11.237	11.986	12.955
	adrenal gland cortex (adrenal cortex)	11.208	11.542	12.75
	adipose tissue (fat)	11.203	11.535	12.71
	cardiac muscle (myocardium)	11.181	11.935	13.205
	pars reticulata	11.167	12.367	11.84
	amygdala	11.164	12.4	12.006
	tonsil	11.16	11.645	13.062
	reticular dermis cell	11.141	11.902	14.007
	fundus	11.134	11.172	13.109
	subthalamic nucleus	11.113	11.627	11.906
	pons	11.083	12.31	11.768
	salivary gland	11.065	11.123	12.601
	CD4 T-large granular lymphocyte	11.024	10.692	13.441
	lymph node	11.001	11.443	12.86
	heart atrium	10.99	11.561	13.571
	thyroid gland	10.952	11.092	13.024
	peripheral blood leukocyte	10.934	10.803	13.753
	medulla oblongata	10.915	12.194	12.2
	hypothalamus	10.908	12.365	12.312
	umbilical cord	10.895	11.993	13.327
	medulla	10.892	11.449	13.165
	pyramidal neuron (hippocampus)	10.891	11.728	12.667
	internal globus pallidus	10.853	11.965	12.506
	heart	10.831	11.349	13.558
	lateral nuclei	10.817	11.847	11.526
	pyloric antrum	10.815	11.186	12.894
	thalamus	10.794	12.035	11.936
	prostate stromal cell	10.79	11.943	13.451
	large intestine	10.784	10.791	12.474
	kidney	10.779	10.88	13.356
	mucosa (pharynx)	10.764	12.45	13.225
	breast stromal cell	10.756	11.133	13.35
	pyramidal neuron (posterior cingulate)	10.742	11.505	12.255
	ventral tegmental area	10.728	12.055	11.933
	globus pallidus	10.722	12.035	11.893
	basal epidermis cell	10.699	13.785	13.708
	accumbens nucleus	10.698	12.653	11.97
	pyramidal neuron (superior frontal gyrus)	10.673	11.642	12.65
	bronchus	10.633	11.322	12.982
	pyramidal neuron (middle temporal gyrus)	10.623	11.738	12.712
	tongue	10.605	11.936	13.327
	plasmacytoid dendritic cell	10.601	11.705	13.842
	pyramidal neuron (primary visual cortex)	10.574	11.41	12.722
	putamen	10.493	12.856	11.908
	cardia	10.488	11.084	12.875
	bone marrow erythroblast (CD235a+)	10.479	11.111	12.839
	dermal papilla	10.45	11.778	12.935
	basal ganglia	10.418	12.471	11.755
	tonsillar T-lymphocyte (resting)	10.418	10.843	13.936
	ovary stromal cell	10.39	9.425	12.742
	saphenous vein	10.387	11.455	13.349
	suprabasal epidermis cell	10.382	14.137	14.244
	trachea	10.322	11.586	12.956
	heart ventricle	10.297	11.528	13.127
	genu	10.257	11.147	12.04
	small intestine	10.202	11.341	13.065
	skeletal muscle	10.2	12.176	14.043
	nipple	10.171	12.533	13.17
	cerebral white matter	10.163	11.919	11.8
	large stellate neuron (entorhinal cortex)	10.05	11.437	12.233
	coronary artery	10.031	11.854	12.724
	bone marrow endothelial progenitor cell (CD133+)	10.014	9.714	13.648
	pancreatic duct	9.987	11	13.286
	CD30+/CD3+ T-lymphocyte	9.984	10.486	13.306
	CD4+/CD3+/CD25+ activated T-lymphocyte	9.875	10.375	13.014
	tongue squamous cell	9.856	10.754	13.574
	uterus	9.787	11.689	13.011
	CD4+/CD3+/CD25- resting T-lymphocyte	9.749	10.489	13.142
	CD4+/CD3+/CD25high regulatory T-cell	9.615	10.556	13.345
	platelet	9.528	9.26	12.951
	bone marrow cell	9.418	11.487	13.85
	CD8+/CD3+/HLA-DR+ activated T-lymphocyte	9.382	10.132	12.989
	tonsillar NK cell	9.359	10.352	12.875
	natural killer cell	9.183	10.023	11.999
	natural killer T-cell	9.081	10.43	13.183
	CD8+/CD3+/HLA-DR- resting T-lymphocyte	9.011	10.251	12.523
