# Supplementary material for: Mapping the functional versatility and fragility of Ras GTPase signaling circuits through in vitro network reconstitution
Source: eLife journal article supplement (doi:10.7554/elife.12435), 2016-01-14

**A**

**Initial Rate of Effector Recruitment with Increasing [GEF]**

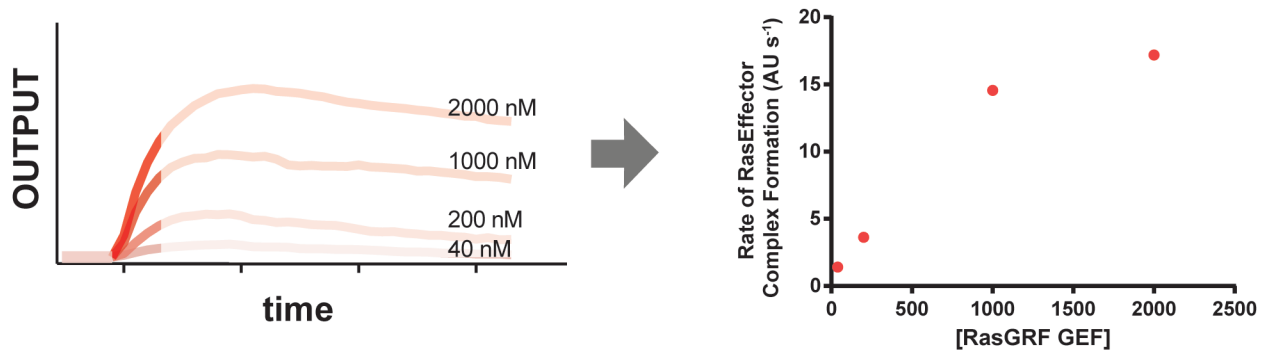

**B**

**Steady-state Ras-Effector Complex Levels with Increasing [GEF]**

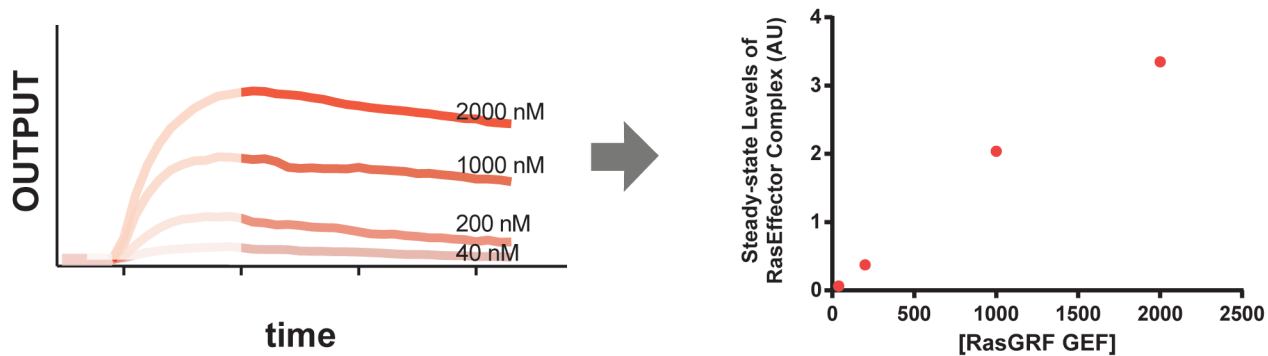

**C**

**$k_{obs}$  for RasEffector disappearance with increasing [GAP]**

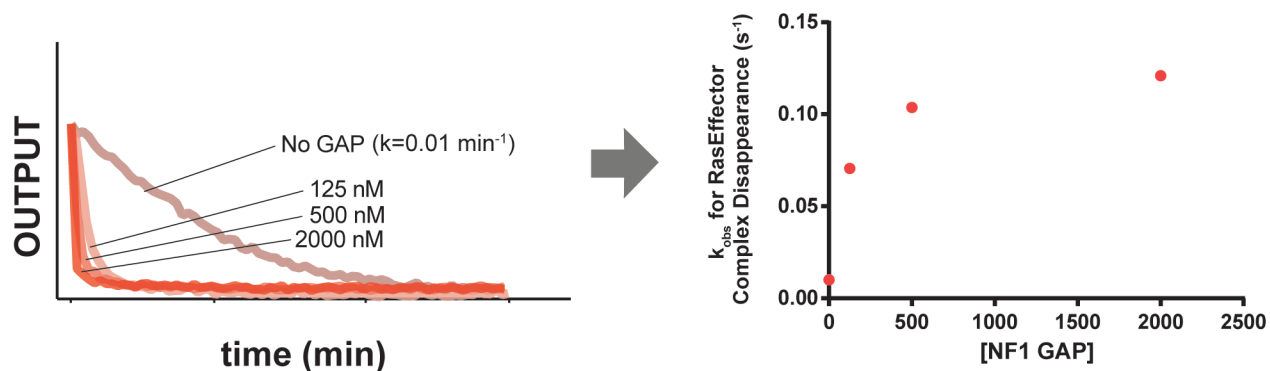

Supplement: supp [file elife-12435-supp-v1.zip]
