# Supplementary material for: Mapping the functional versatility and fragility of Ras GTPase signaling circuits through in vitro network reconstitution
Source: eLife journal article supplement (doi:10.7554/elife.12435), 2016-01-14

**A** Normalized (to maximum output) responses of p120GAP/RasGRF/RafRBD/Ras Signaling System Under A Variety of Network Configurations

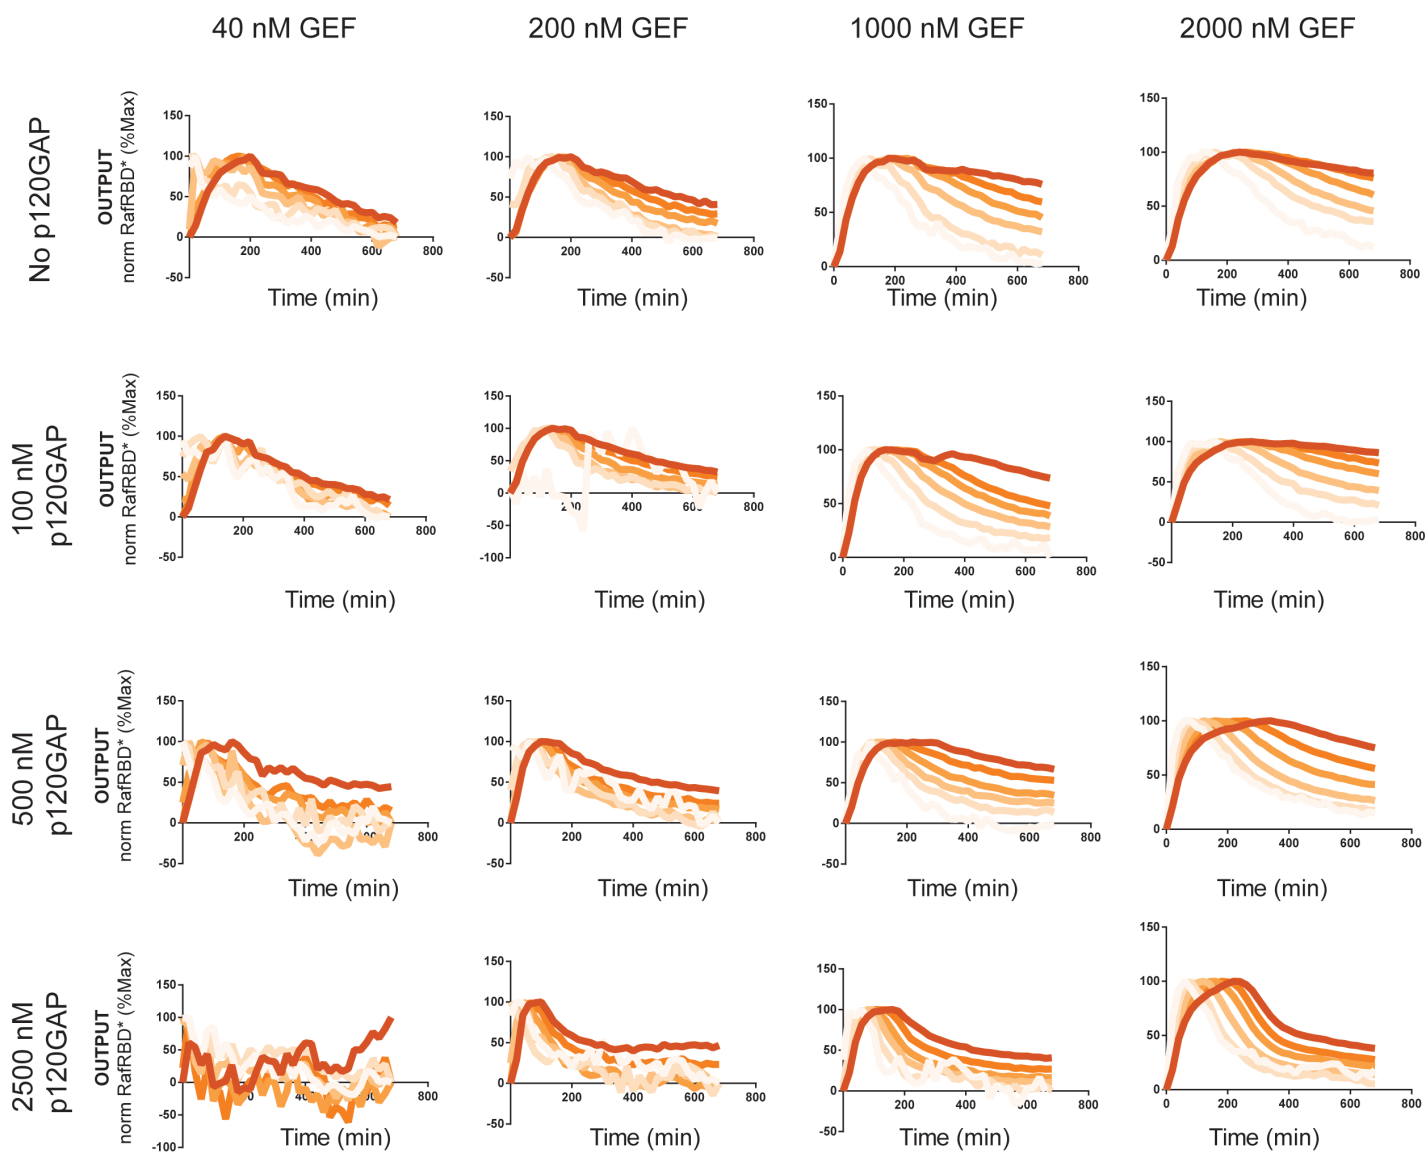

Approximate Ras Density (molecules /  $\mu\text{m}^2$ )

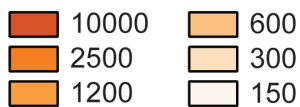

Supplement: supp [file elife-12435-supp-v1.zip]
