# Supplementary material for: Mapping the functional versatility and fragility of Ras GTPase signaling circuits through in vitro network reconstitution
Source: eLife journal article supplement (doi:10.7554/elife.12435), 2016-01-14

**A**

## Simplest 2-State Ras-GTPase System

*GAP tunes steady state level but cannot produce overshoot in any regime*

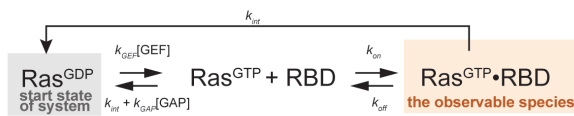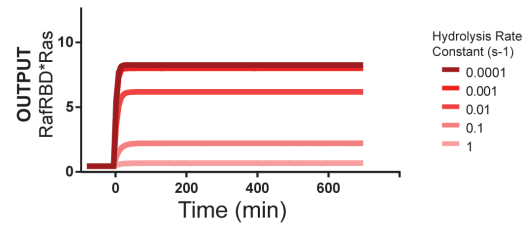

**B**

## 2-State Ras-GTPase System + GAP competition

*Competition between GEF and GAP can produce overshoot but only with nonphysiological parameters; also does not distinguish G12V from WT*

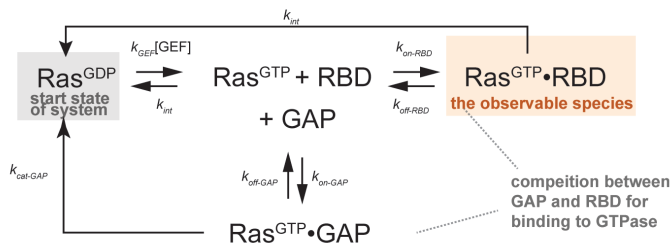

**non-physiologic:** GAP binds more tightly than Raf-RBD and has little catalytic activity

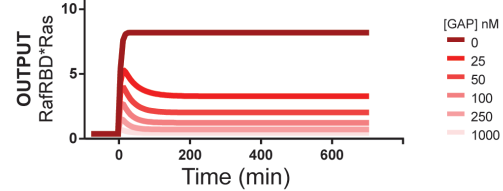

**physiologic:** GAP binds less tightly than Raf-RBD and has strong catalytic activity

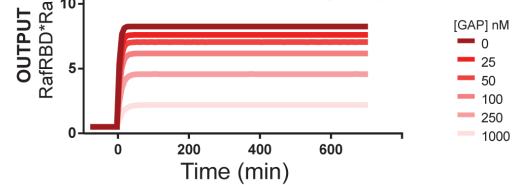

**C**

## 3-State Ras-GTPase System + GAP competition

*Overshoot possible with physiologic parameters and distinguishes WT and G12V*

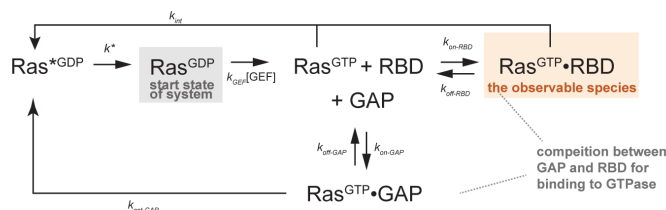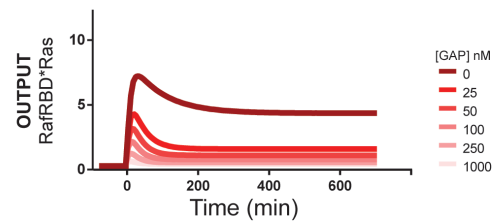

Supplement: supp [file elife-12435-supp-v1.zip]
