# Supplementary material for: Mapping the functional versatility and fragility of Ras GTPase signaling circuits through in vitro network reconstitution
Source: eLife journal article supplement (doi:10.7554/elife.12435), 2016-01-14

**A**

**Transient and sustained signals from different effectors  
at the same time consistent with competition in model**

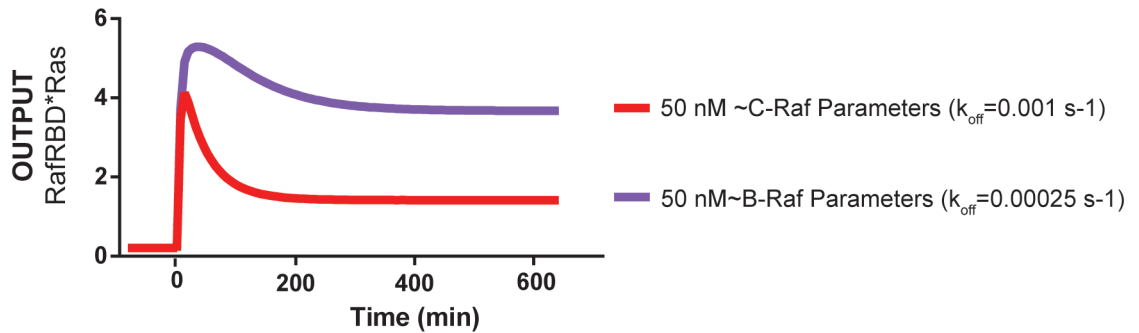**B**

**Very small changes in effector parameters can change  
relative timing of transient effector signals in model**

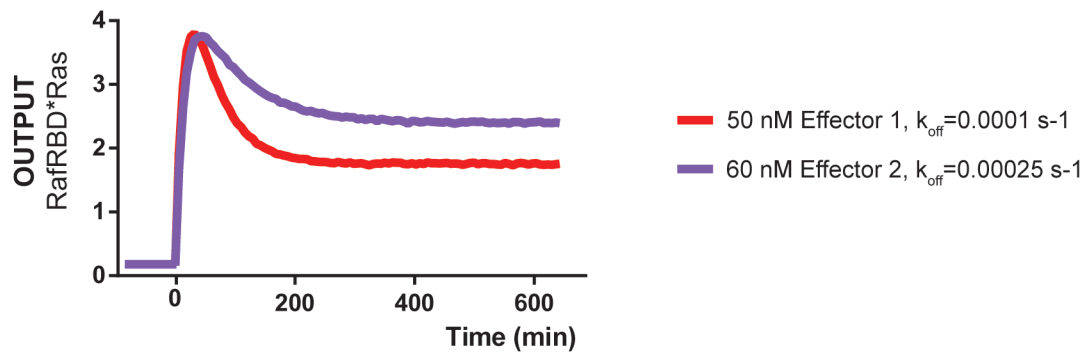**C**

**Example of three waves of effector activity produced in model  
by titration of effector abundance and binding parameters**

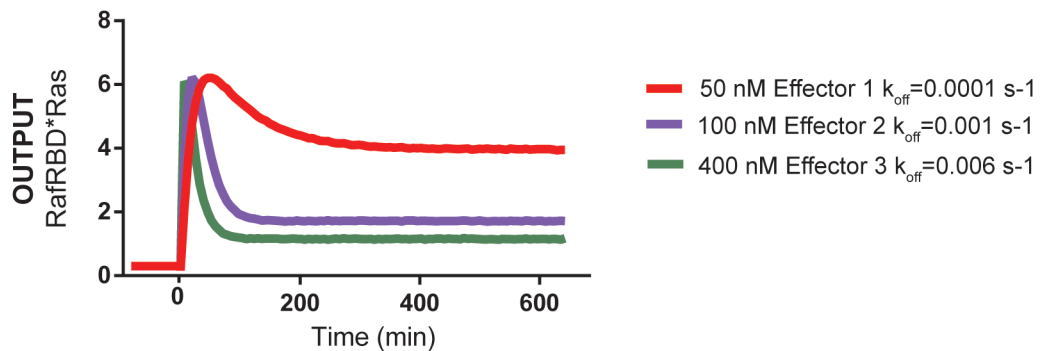

Supplement: supp [file elife-12435-supp-v1.zip]
