# Supplementary material for: Mapping the functional versatility and fragility of Ras GTPase signaling circuits through in vitro network reconstitution
Source: eLife journal article supplement (doi:10.7554/elife.12435), 2016-01-14

A

[GTPase] impacts signal transience in model

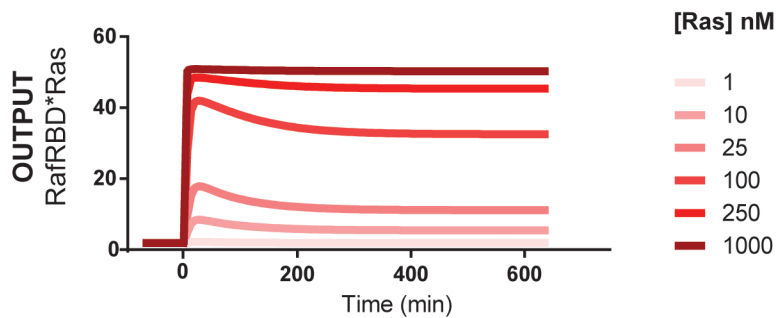

B

Km and kcat of GAP sculpt transient pulse shape in model

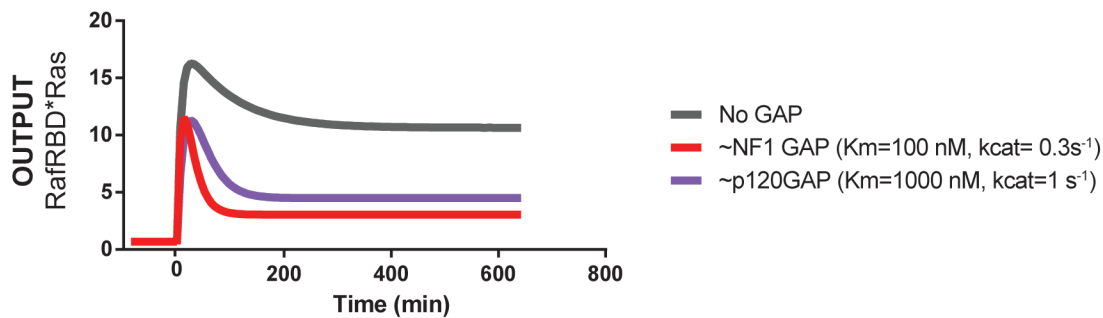

C

[Effector] impacts ability to capture transient signals in model

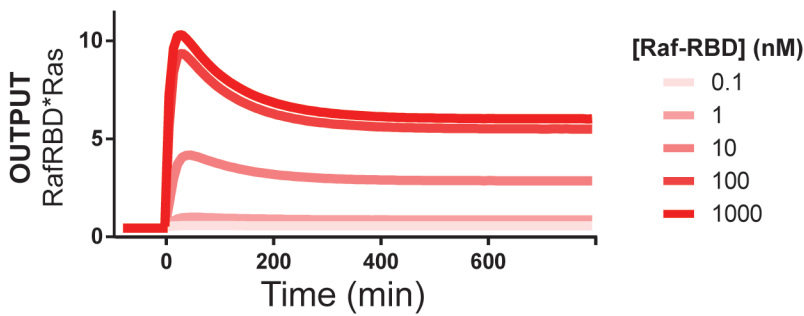

Supplement: supp [file elife-12435-supp-v1.zip]
