# Supplementary figures and images for: Mapping the functional versatility and fragility of Ras GTPase signaling circuits through in vitro network reconstitution
Source: eLife journal article supplement (doi:10.7554/elife.12435), 2016-01-14

A

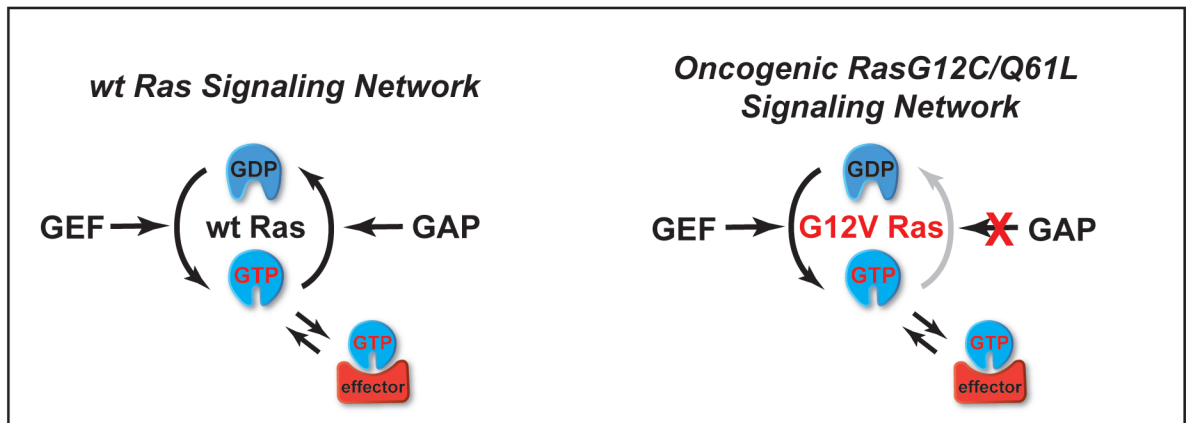

B

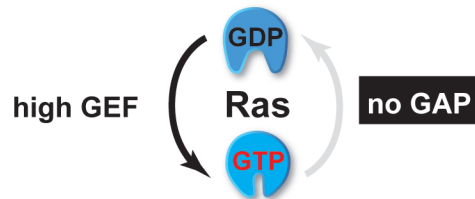

WT  
v.  
G12C

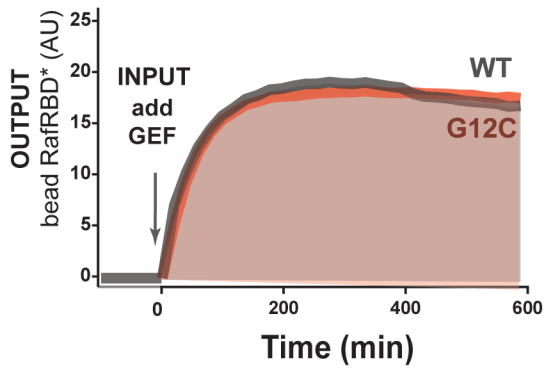

C

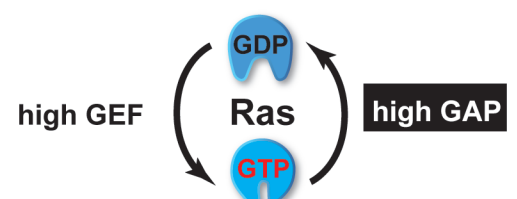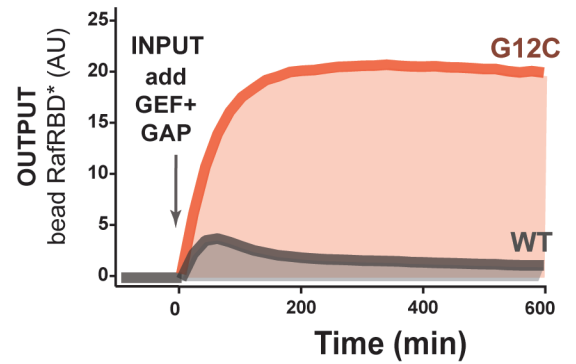

D

WT  
v.  
Q61L

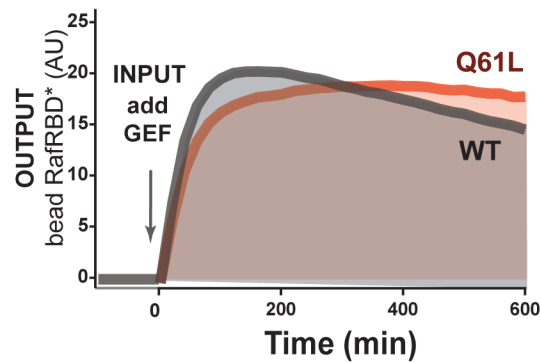

E

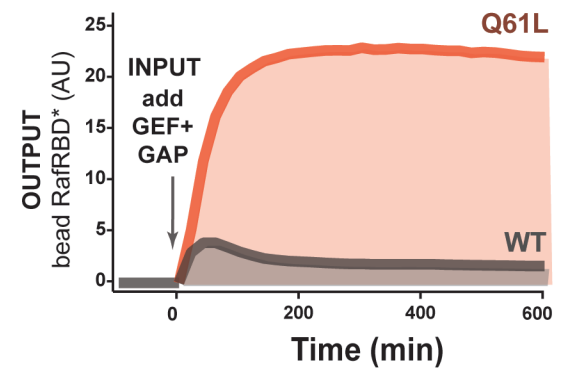

Supplement: supp [file elife-12435-supp-v1.zip]

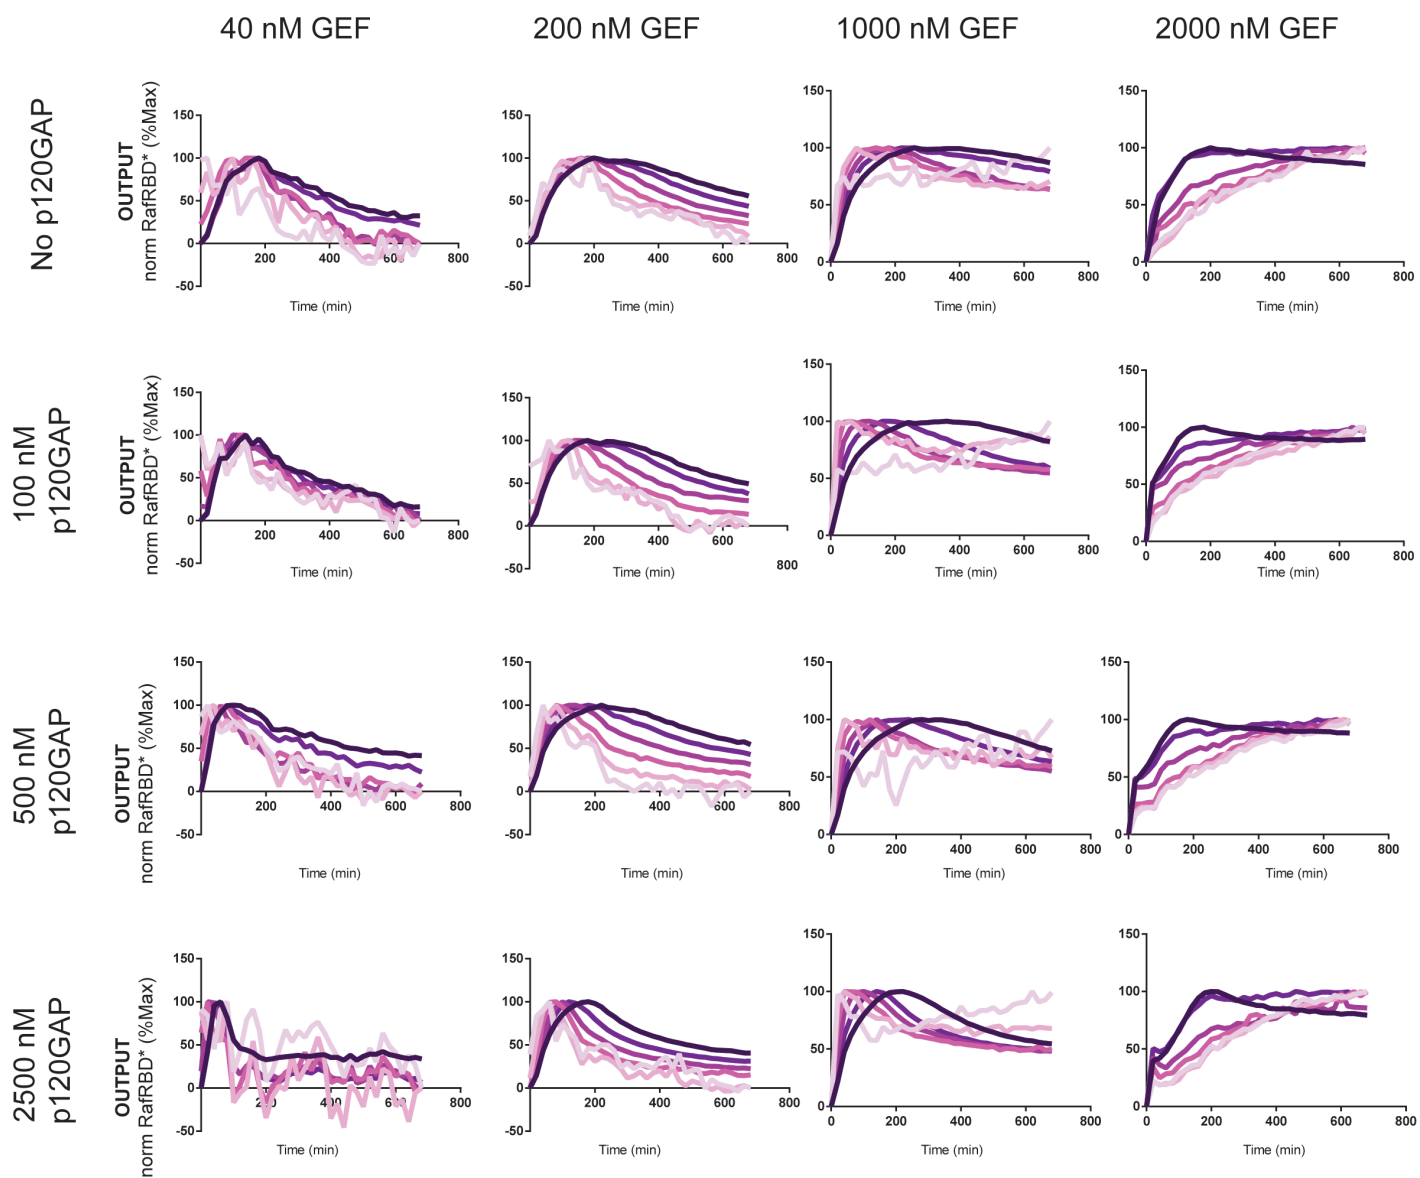

Approximate Ras Density (molecules /  $\mu\text{m}^2$ )

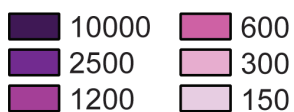

Supplement: supp [file elife-12435-supp-v1.zip]

## Multi-Effector Ras Signaling Network

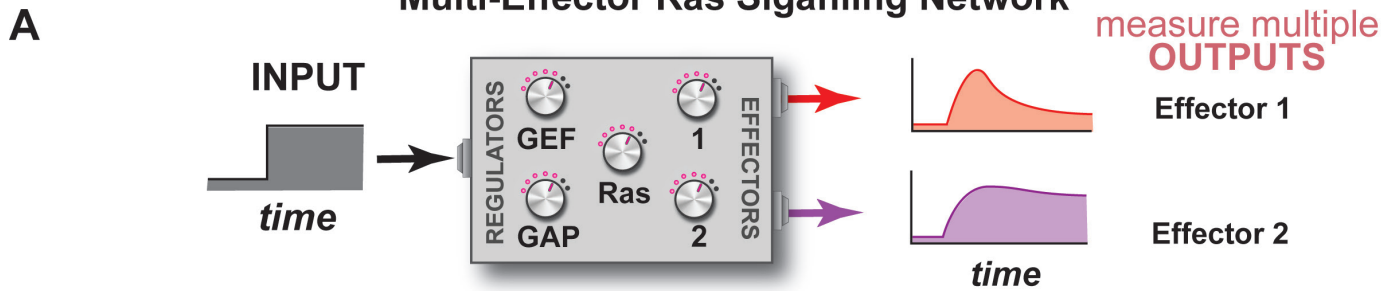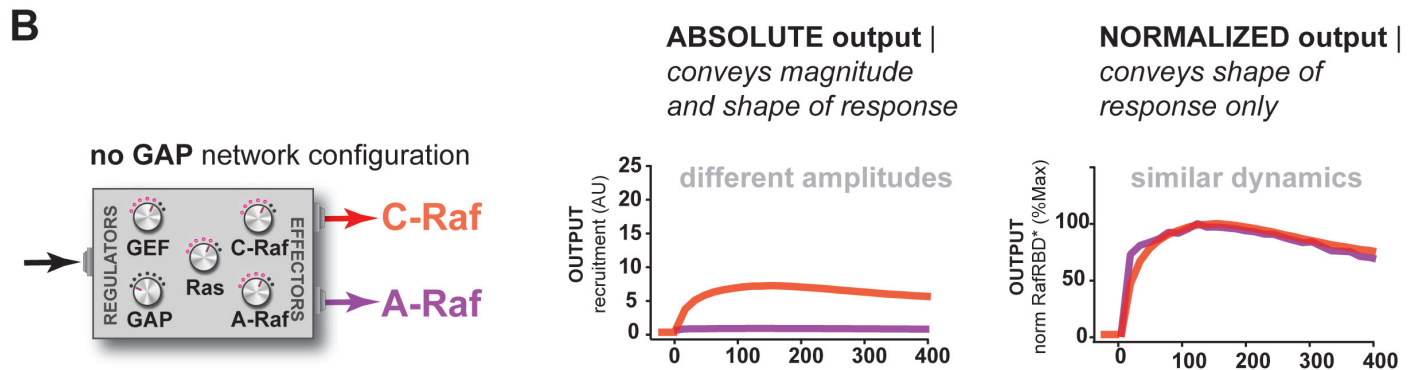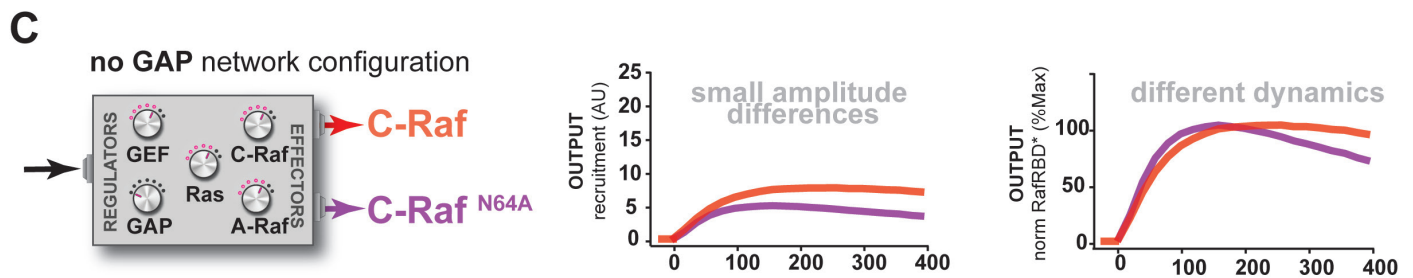

Supplement: supp [file elife-12435-supp-v1.zip]

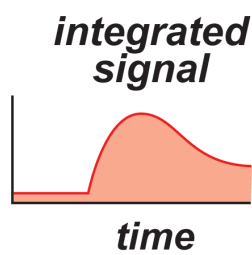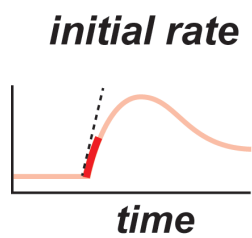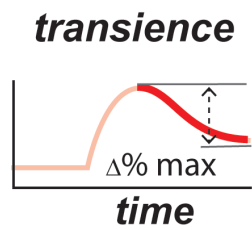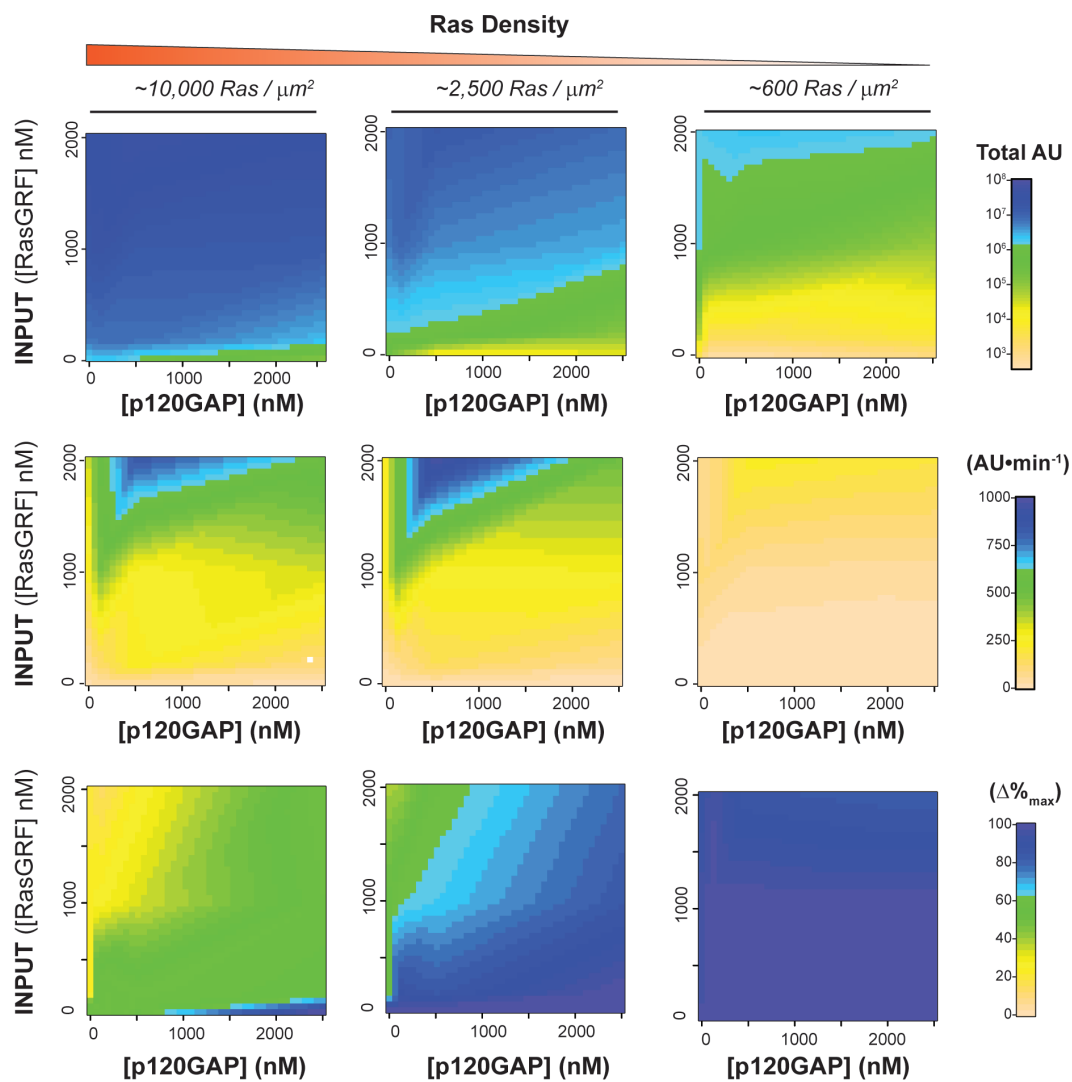

Supplement: supp [file elife-12435-supp-v1.zip]
